# Supplementary material for: Construction of a Novel Damage-Associated Molecular-Pattern-Related Signature to Assess Lung Adenocarcinoma’s Prognosis and Immune Landscape
Source: MDPI journal article supplement (doi:10.3390/biom14010108), 2024-01-15
Supplement: s1 [file s1]

## Supplementary Materials

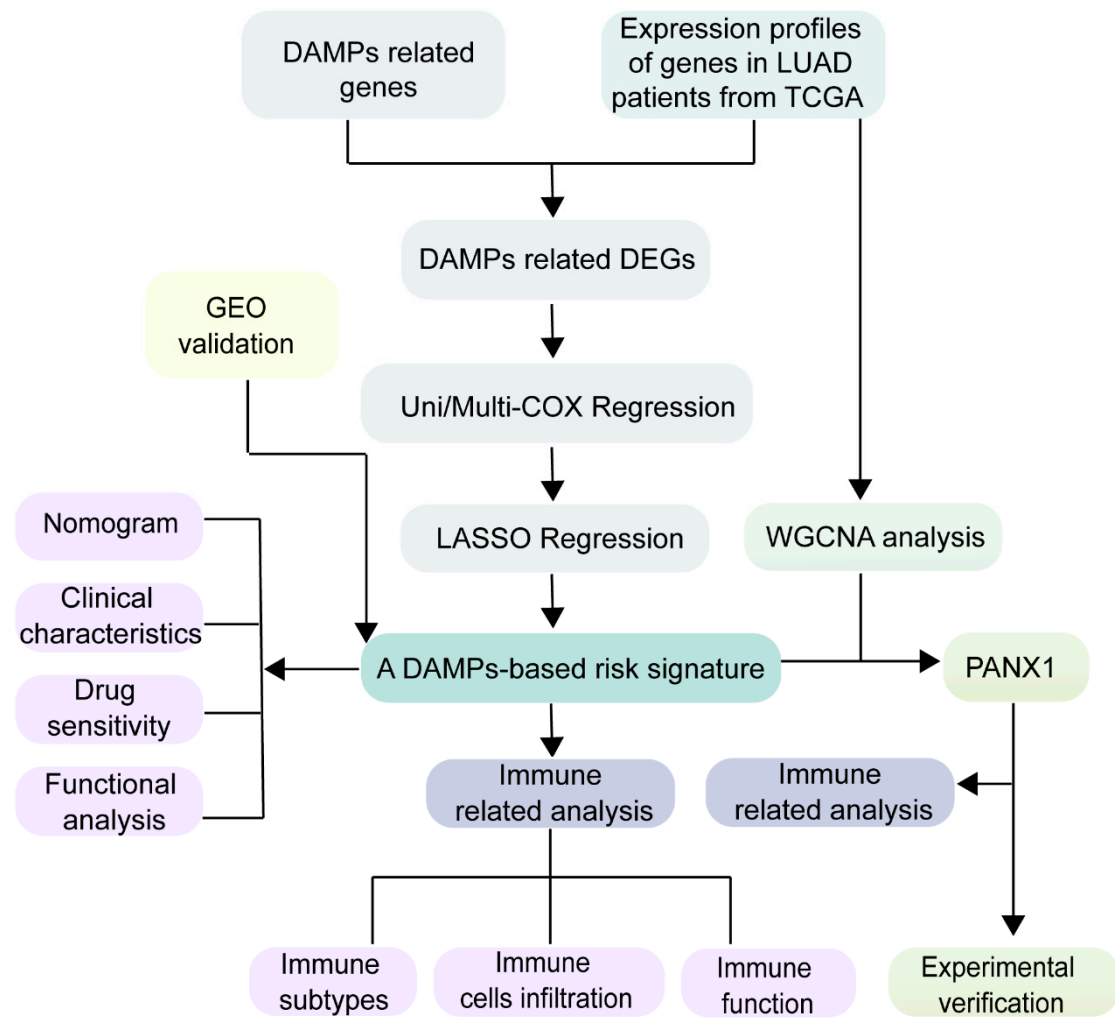

**Figure S1.** The detailed analysis process of this study.

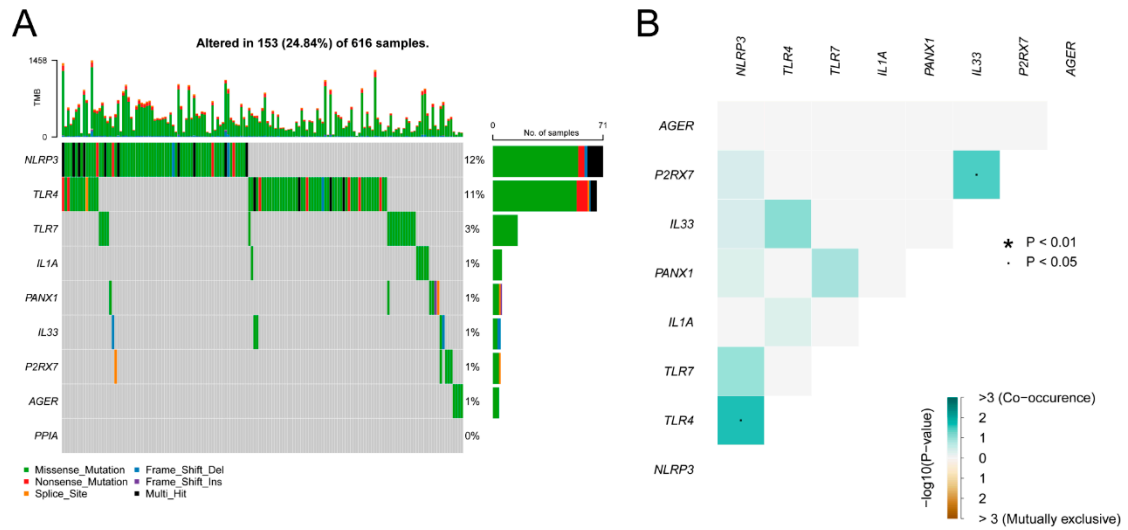

**Figure S2.** Mutation information of 9 prognostic DAMPs-related genes. **(A)** Waterfall plot of gene mutation types. **(B)** Gene co-mutations.

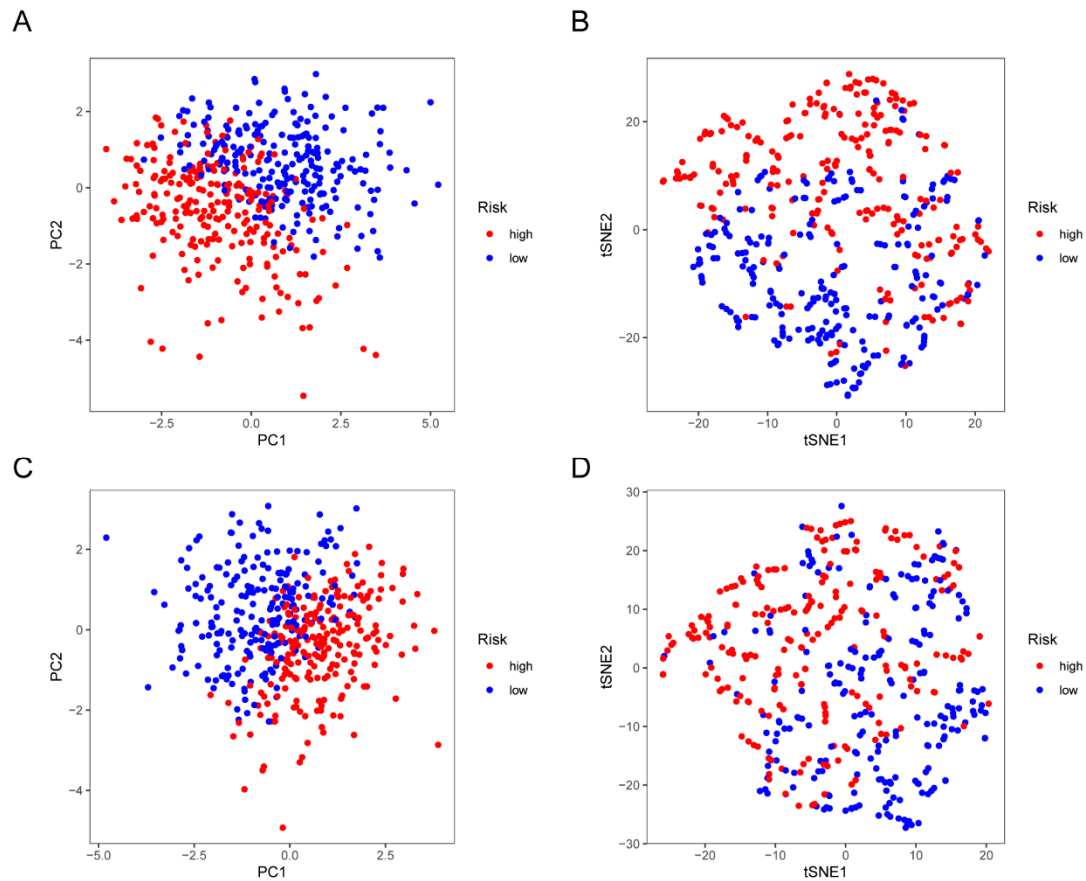

**Figure S3.** PCA and t-SNE analysis of the signature. **(A, B)** PCA (A) and t-SNE analysis (B) of TCGA database. **(C, D)** PCA (C) and t-SNE analysis (D) of GEO database.

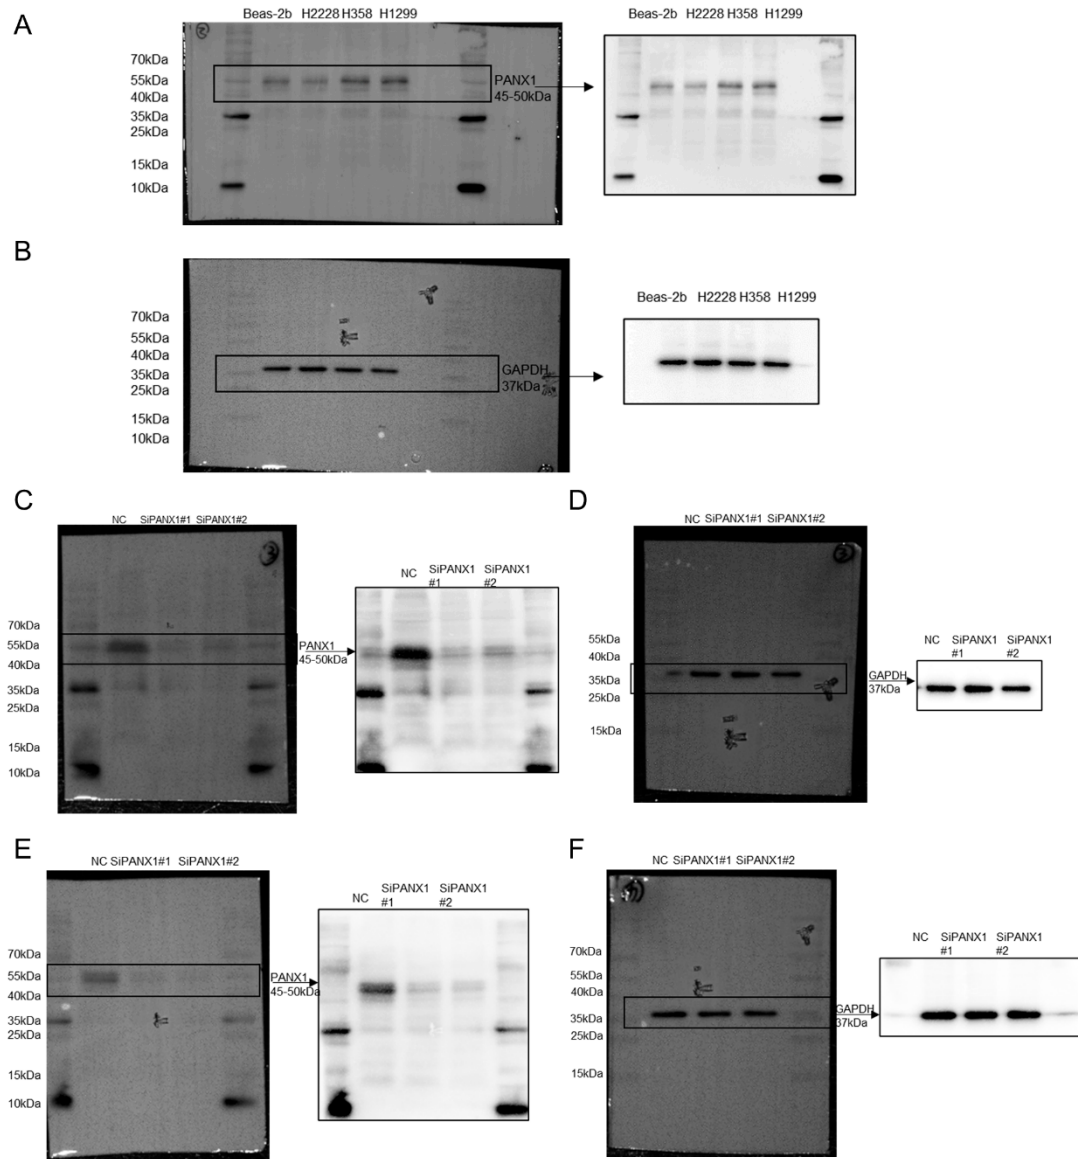

**Figure S4.** Original images for western blots. **(A)** Original western blot of PANX1 in Figure 10A. **(B)** Original western blot of GAPDH in Figure 10A. **(C)** Original western blot of H1299 PANX1 in Figure 10C. **(D)** Original western blot of H1299 GAPDH in Figure 10C. **(E)** Original western blot of H358 PANX1 in Figure 10C. **(F)** Original western blot of H358 GAPDH in Figure 10C.
